# Supplementary material for: Spatiotemporal plasticity of the gut microbiome facilitates redbelly tilapia (Coptodon zillii) invasion in China
Source: Research Square preprint supplement (doi:10.21203/rs.3.rs-8525469/v1), 2026-02-09
Supplement: Supplementary file 1 [file 1d57b81d305f32a88e3f65d5.docx]

**Table 1** Alpha diversity indices [Shannon-Wiener index(*H’*), Pielou’s evenness index(*J*)] and Niche breadth index(*B*) of gut microbiota between habitat types and seasons

| Index | Habitat type | | | | | Seasons of SKSK | | | |
| --- | --- | --- | --- | --- | --- | --- | --- | --- | --- |
| River | | Reservoir | | | Spring | Summer | Autumn | Winter |
| DJ | NDJ | QDH | SKSK | XJ |
| *H’* | 4.4586ab ± 0.6322 | 5.2228ab ± 0.3938 | 4.2078a ± 0.8891 | 5.9784b ± 0.4030 | 4.0424a ± 0.1722 | 5.6651 ± 0.3222 | 5.3280 ± 0.5513 | 6.4819 ± 0.4361 | 5.3972 ± 0.5073 |
| *J* | 0.4616a ± 0.0552 | 0.5304ab ± 0.0339 | 0.4313a ± 0.0854 | 0.6078b ± 0.0265 | 0.4276a ± 0.0132 | 0.5983 ± 0.0295 | 0.5769 ± 0.0415 | 0.6414 ± 0.0369 | 0.5728 ± 0.0385 |
| *B* | 3.2730ab ± 0.3146 | 2.7537ab ± 0.3726 | 1.9626a ± 0.1372 | 3.4105b ± 0.4667 | 2.6900ab ± 0.2660 | 2.7367 ± 0.2024 | 2.8500 ± 0.2990 | 2.9259 ± 0.1413 | 2.7554 ± 0.2388 |

Results are represented by mean ± SE. Significant differences (Kruskal Wallis rank sum tests) between habitat types are indicated by superscript with different lowercase letters. No significant differences (Kruskal Wallis rank sum tests) were detected in either alpha diversity indices or niche breadth indices between seasons.

**Table 2** Results of permutational multivariate analysis of variance (PERMANOVA) applied to gut microbiota data for *C. zillii* between habitat types and seasons

| Type of grouping | Pairwise comparison group | *df* | SumsOfSqs | MeanSqs | *F*.Model | *R*2 | *P*r(>*F*) |
| --- | --- | --- | --- | --- | --- | --- | --- |
| habitat | DJ-XJ | 1(8) | 0.7184(2.1314) | 0.7184(0.2664) | 2.6965 | 0.2521(0.7479) | 0.021 |
|  | DJ-NDJ | 1(8) | 0.7767(1.9331) | 0.7767 (0.2416) | 3.2144 | 0.2866(0.7134) | 0.010 |
|  | DJ-SKSK | 1(8) | 0.9377(2.2434) | 0.9377(0.2804) | 3.3438 | 0.2948(0.7052) | 0.006 |
|  | DJ-QDH | 1(7) | 0.9219(2.1228) | 0.9219(0.3033) | 3.0399 | 0.3028(0.6972) | 0.024 |
|  | XJ-NDJ | 1(8) | 0.9959(1.2087) | 0.9959(0.1511) | 6.5920 | 0.4518(0.5483) | 0.007 |
|  | XJ-SKSK | 1(8) | 1.2297(1.5189) | 1.2297(0.1899) | 6.4769 | 0.4474(0.5526) | 0.008 |
|  | XJ-QDH | 1(7) | 1.4546(1.3983) | 1.4546(0.1998) | 7.2819 | 0.5099(0.4901) | 0.005 |
|  | NDJ-SKSK | 1(8) | 1.2226(1.3207) | 1.2226(0.1651) | 7.4063 | 0.4807(0.5193) | 0.007 |
|  | NDJ-QDH | 1(7) | 1.4834(1.2001) | 1.4834(0.1714) | 8.6525 | 0.5528(0.4472) | 0.017 |
|  | SKSK-QDH | 1(7) | 1.2765(1.5103) | 1.2765(0.2158) | 5.9164 | 0.4581(0.5420) | 0.009 |
| season | Spring-Summer | 1(28) | 1.0428(10.3347) | 1.0428(0.3691) | 2.8253 | 0.0917(0.9084) | 0.002 |
|  | Spring-Autumn | 1(28) | 1.4234(9.6801) | 1.4234(0.3457) | 4.1172 | 0.1282(0.8718) | 0.001 |
|  | Spring-Winter | 1(26) | 1.0840(9.3363) | 1.0840(0.3591) | 3.0188 | 0.1040(0.8960) | 0.001 |
|  | Summer-Autumn | 1(28) | 0.8474(9.3453) | 0.8474(0.3338) | 2.5389 | 0.0831(0.9169) | 0.017 |
|  | Summer-Winter | 1(26) | 0.9320(9.0015) | 0.9320(0.3462) | 2.6920 | 0.0938(0.9062) | 0.009 |
|  | Autumn-Winter | 1(26) | 1.1695(8.3469) | 1.1695(0.3210) | 3.6430 | 0.1229(0.8771) | 0.001 |

*df* represents degrees of freedom; SumsOfSqs represents the sum of squared deviations; MeanSqs represents Mean squares; *F*.Model represents *F*-test value; *R*2 represents the explanatory power of different groups on sample differences, that is, the ratio of group variance to total variance; *P*r represents the *P*-value. The values corresponding to the residual term are enclosed in parentheses.

**Table 3** Results of Redundancy Analysis (RDA) between phylum-level gut microbiota data and environmental variables for *C. zillii* from five sampling sites and four seasons of SKSK

| Type of grouping | Environmental factors | RDA1 | RDA2 | *r*2 | *Pr*(>*r*) |
| --- | --- | --- | --- | --- | --- |
| habitat | Water temperature | 0.3046 | -0.9525 | 0.0253 | 0.7586 |
| Dissolved oxygen | -0.0993 | 0.9951 | 0.8269 | 0.0005 |
| Conductivity | 0.9606 | -0.2780 | 0.3385 | 0.0165 |
| seasons of SKSK | pH | -0.6138 | 0.7894 | 0.2305 | 0.0010 |
| Conductivity | 0.4261 | 0.9047 | 0.2192 | 0.0015 |
| Turbidity degree | -0.7085 | -0.7057 | 0.1203 | 0.0235 |
| Permanganate index | -0.9228 | 0.3853 | 0.1783 | 0.0040 |
| Total phosphorus | -0.8707 | -0.4918 | 0.0399 | 0.3233 |
| Total nitrogen | -0.9910 | -0.1335 | 0.5679 | 0.0005 |

RDA1 and RDA2 represent the first and second ordination axes of RDA analysis, respectively. The values corresponding to RDA1 and RDA2 are the cosine values of the angle between the environmental factor arrow and the ordination axis, indicating the correlation between the environmental factor and the ordination axis. *r*2 represents the coefficient of determination of environmental factors on species distribution, The smaller *r*2, the smaller the impact of the environmental factor on species distribution. *Pr* represents the *P*-value of the significance test of correlation.

**Table 4** Results of Redundancy Analysis (RDA) between genus-level gut microbiota data and environmental variables for *C. zillii* from five sampling sites and four seasons of SKSK

| Type of grouping | Environmental factors | RDA1 | RDA2 | *r*2 | *Pr*(>*r*) |
| --- | --- | --- | --- | --- | --- |
| habitat | Water temperature | 0.7843 | 0.6203 | 0.2756 | 0.0355 |
| Dissolved oxygen | -0.2386 | -0.9711 | 0.8079 | 0.0005 |
| Conductivity | 0.9730 | -0.2306 | 0.1844 | 0.1054 |
| seasons of SKSK | pH | -0.1102 | -0.9939 | 0.1612 | 0.0050 |
| Conductivity | 0.5790 | -0.8153 | 0.2770 | 0.0005 |
| Turbidity degree | -0.0374 | 0.9993 | 0.5632 | 0.0005 |
| Permanganate index | 0.4424 | -0.8968 | 0.0030 | 0.9215 |
| Total phosphorus | -0.9959 | -0.0906 | 0.0240 | 0.5082 |
| Total nitrogen | -0.9978 | -0.0669 | 0.3955 | 0.0005 |

RDA1 and RDA2 represent the first and second ordination axes of RDA analysis, respectively. The values corresponding to RDA1 and RDA2 are the cosine values of the angle between the environmental factor arrow and the ordination axis, indicating the correlation between the environmental factor and the ordination axis. *r*2 represents the coefficient of determination of environmental factors on species distribution, The smaller *r*2, the smaller the impact of the environmental factor on species distribution. *Pr* represents the *P*-value of the significance test of correlation.
