# Supplementary material for: Spatiotemporal plasticity of the gut microbiome facilitates redbelly tilapia (Coptodon zillii) invasion in China
Source: Research Square preprint supplement (doi:10.21203/rs.3.rs-8525469/v1), 2026-02-09
Supplement: Supplementary file 3 [file cba3f37b34048f2171060ec4.docx]

**Table S1** List of the 5 sampling sites from which specimens of *Coptodon zillii* were collected including their location, number of fish caught (F: females; M: males), environmental parameters (Dissolved oxygen, pH, Conductivity, Water temperature, Turbidity degree, Permanganate index, Ammonia nitrogen, Total phosphorus, Total nitrogen) downloaded from China National Environmental Monitoring Centre (<https://www.cnemc.cn/>), and site-specific climate data (Daily mean temperature, Daily maximum and minimum temperature, and Daily precipitation sum) downloaded from Public Meteorological Service Center of China Meteorological Administration (https://www.tianqi24.com/) at 0.1 degrees resolution

| Population | Location | Habitat type | Sampling date | Latitude (N) | Longitude  (E) | No. of samples (F\M) | Water temperature  (℃) | pH | Dissolved oxygen (mg/L) | Conductivity (μS/cm) | Turbidity degree  (NTU) | Permanganate index (mg/L) | Ammonia nitrogen (mg/L) | Total phosphorus  (mg/L) | Total nitrogen (mg/L) | Daily mean temperature  (℃) | Daily minimum temperature(℃) | Daily maximum temperature(℃) | Daily precipitation sum (mm) |
| --- | --- | --- | --- | --- | --- | --- | --- | --- | --- | --- | --- | --- | --- | --- | --- | --- | --- | --- | --- |
| DJ | Huizhou City, Guangdong Province | River | 26/10/2022 | 23.16oN | 114.60oE | 51(26\25) | 24.31 | 7.19 | 7.71 | 111.01 | 20.37 | 1.77 | 0.044 | 0.044 | 1.72 | 23.5 | 19 | 28 | 466 |
| NDJ | Ding'an County, Hainan Province | River | 3/11/2022 | 19.72oN | 110.37oE | 55(23\32) | 27.26 | 7.43 | 7.89 | 101.33 | 29.89 | 2.68 | 0.047 | 0.086 | 1.28 | 25.5 | 21 | 30 | 1076.1 |
| QDH | Chun'an County, Zhejiang Province | Reservoir | 15/10/2022 | 29.58oN | 119.08oE | 110(59\51) | 21.32 | 8.68 | 9.11 | 139.11 | 4.04 | 1.63 | 0.040 | 0.012 | 0.94 | 18.5 | 14 | 23 | 1125.7 |
| SKSK | Nanping City, Fujian Province | Reservoir | 22/10/2022 | 26.40oN | 118.50oE | 63(33\30) | 23.83 | 6.99 | 6.61 | 118.64 | 27.20 | 1.89 | 0.099 | 0.065 | 1.70 | 20.5 | 15 | 26 | 1403.1 |
| XJ | Xincheng County, Guangxi Zhuang Autonomous Region | Reservoir | 14/11/2022 | 23.97oN | 108.61oE | 68(31\37) | 22.24 | 7.78 | 7.15 | 362.69 | 7.35 | 0.70 | 0.025 | 0.0073 | 1.80 | 21.0 | 17 | 25 | 709.5 |

**Table S2** Morphological data of eighty-two specimens of *C. zillii* for gut microbiota analysis between habitat types and seasons

| Character |  | Habitat type | | | | | Seasons of SKSK | | | |
| --- | --- | --- | --- | --- | --- | --- | --- | --- | --- | --- |
| River | | Reservoir | | | Spring | Summer | Autumn | Winter |
| DJ | NDJ | QDH | SKSK | XJ |
| Standard length | (mean ± SE) (mm) | 111.4±3.65 | 145.5±1.89 | 111.9±1.043 | 113.3±1.92 | 105.4±1.42 | 141.7±9.30 | 121.3±6.65 | 104.8±4.75 | 125.3±5.75 |
|  | range (mm) | 69.0～166.0 | 121.0～173.0 | 91.0～146.0 | 91.0～160.0 | 84.0～128.0 | 82.0～220.0 | 92.0～163.0 | 76.0～138.0 | 103.0～180.0 |
| Body weight | (mean± SE) (g) | 54.47±5.23 | 105.8±4.43 | 56.63±1.62 | 58.62±3.30 | 44.8±1.80 | 154.8±26.25 | 80.73±14.09 | 43.93±5.75 | 82.60±14.04 |
|  | range (g) | 12.08～156.70 | 55.75～188.40 | 33.67～110.10 | 27.02～161.7 | 21.42～74.83 | 49.56～463.2 | 27.21～187.3 | 16.20～85.93 | 38.44～208.8 |

SE represents standard error.

**Table S3** Barcode sequences for each sample used in this study

|  |  | Sample ID | Barcode sequence (5’-3’) connected to the left end of the primer 341F | Barcode sequence (5’-3’) connected to the right end of the primer 806R |
| --- | --- | --- | --- | --- |
| Habitat type | River | DJ1 | TAGCTT | ATTCCT |
|  |  | DJ2 | ATCACG | CGTACG |
|  |  | DJ3 | CTTGTA | ATTCCT |
|  |  | DJ4 | CGATGT | CGTACG |
|  |  | DJ5 | CGATGT | CAAAAG |
|  |  | NDJ1 | ACTTGA | CAAAAG |
|  |  | NDJ2 | AGTCAA | CGTACG |
|  |  | NDJ3 | TAGCTT | CAAAAG |
|  |  | NDJ4 | GGCTAC | CAAAAG |
|  |  | NDJ5 | CTTGTA | CAAAAG |
|  | Reservoir | QDH1 | GCCAAT | GTTTCG |
|  |  | QDH2 | ATGTCA | GTTTCG |
|  |  | QDH3 | ACTTGA | GTTTCG |
|  |  | QDH4 | GATCAG | GTTTCG |
|  |  | SKSK1 | ATCACG | GTTTCG |
|  |  | SKSK2 | CGATGT | GTTTCG |
|  |  | SKSK3 | AGTCAA | GTTTCG |
|  |  | SKSK4 | TGACCA | GTTTCG |
|  |  | SKSK5 | ACAGTG | GTTTCG |
|  |  | XJ1 | AGTCAA | CAAAAG |
|  |  | XJ2 | TGACCA | CAAAAG |
|  |  | XJ3 | ACAGTG | CAAAAG |
|  |  | XJ4 | GCCAAT | CAAAAG |
|  |  | XJ5 | ATGTCA | CAAAAG |
| Seasons of SKSK | Spring | SKSK1 | ATCACG | GTTTCG |
|  |  | SKSK2 | CGATGT | GTTTCG |
|  |  | SKSK3 | AGTCAA | GTTTCG |
|  |  | SKSK4 | TGACCA | GTTTCG |
|  |  | SKSK5 | ACAGTG | GTTTCG |
|  |  | SKSK6 | AGTCAA | ATGAGC |
|  |  | SKSK7 | TGACCA | ATGAGC |
|  |  | SKSK8 | ACAGTG | ATGAGC |
|  |  | SKSK9 | AGTCAA | GTTTCG |
|  |  | SKSK10 | ATGTCA | ATGAGC |
|  |  | SKSK11 | TAGCTT | ATGAGC |
|  |  | SKSK12 | GGCTAC | ATGAGC |
|  |  | SKSK13 | CTTGTA | ATGAGC |
|  |  | SKSK14 | ATCACG | ATTCCT |
|  |  | SKSK15 | CGATGT | ATTCCT |
|  | Summer | SKSK16 | AAGTGACC | CCTTCAAG |
|  |  | SKSK17 | CCATATCG | CTAGAGAC |
|  |  | SKSK18 | AGCGAATC | ACGTGAAC |
|  |  | SKSK19 | GCCGTAAT | CCTGAGAA |
|  |  | SKSK20 | GCCTATAC | CCAGGAAT |
|  |  | SKSK21 | TTCCGAAC | GGACAATC |
|  |  | SKSK22 | CATGATCC | GACACTTC |
|  |  | SKSK23 | CTAGAACG | GATACTCC |
|  |  | SKSK24 | AACTCCGT | TCAGGCAA |
|  |  | SKSK25 | GCAGATAC | ACACTGTC |
|  |  | SKSK26 | ACCTGTCA | AGACTTCC |
|  |  | SKSK27 | TCCACTGA | ATCGCAAG |
|  |  | SKSK28 | TTCCGAAC | GGACAATC |
|  |  | SKSK29 | CATGATCC | GACACTTC |
|  |  | SKSK30 | CTAGAACG | GATACTCC |
|  | Autumn | SKSK31 | GCAGTAAC | ATTCACCG |
|  |  | SKSK32 | AGCGAATC | ACGTGAAC |
|  |  | SKSK33 | GCCGTAAT | CCTGAGAA |
|  |  | SKSK34 | AGTCCGAA | TATACCGC |
|  |  | SKSK35 | TTCCGAAC | GGACAATC |
|  |  | SKSK36 | CATGATCC | GACACTTC |
|  |  | SKSK37 | CTAGAACG | GATACTCC |
|  |  | SKSK38 | AACTCCGT | TCAGGCAA |
|  |  | SKSK39 | GCAGATAC | ACACTGTC |
|  |  | SKSK40 | ATCGACCT | ACTCGAGA |
|  |  | SKSK41 | TCCACTGA | ATCGCAAG |
|  |  | SKSK42 | TTCCGAAC | GGACAATC |
|  |  | SKSK43 | CATGATCC | GACACTTC |
|  |  | SKSK44 | CTAGAACG | GATACTCC |
|  |  | SKSK45 | AACTCCGT | TCAGGCAA |
|  | Winter | SKSK46 | ACGGATAC | GTCCACTA |
|  |  | SKSK47 | AAGTGACC | CCTTCAAG |
|  |  | SKSK48 | GCAGTAAC | ATTCACCG |
|  |  | SKSK49 | AGCGAATC | ACGTGAAC |
|  |  | SKSK50 | GCCGTAAT | CCTGAGAA |
|  |  | SKSK51 | CCTTACGA | ATACTGCC |
|  |  | SKSK52 | CGGTAACA | ACCAGAGT |
|  |  | SKSK53 | ACGGATAC | GTCCACTA |
|  |  | SKSK54 | AAGTGACC | CCTTCAAG |
|  |  | SKSK55 | GCAGTAAC | ATTCACCG |
|  |  | SKSK56 | CGGTACAA | CATGCAAG |
|  |  | SKSK58 | GGCATCAA | TTACACCG |
|  |  | SKSK59 | CAAGTCGA | CACAAGGT |

**Table S4** List of the abbreviations for the taxa in the gut microbiota of *C. zillii* used in the subsequent figures, tables and the main text.

| Taxon (Phylum) | Abbreviation | Taxon (Genus) | Abbreviation | Taxon (Genus) | Abbreviation | Taxon (Genus) | Abbreviation |
| --- | --- | --- | --- | --- | --- | --- | --- |
| Actinobacteriota | ACTI | Allorhizobium-Neorhizobium-Pararhizobium-Rhizobium | ANPR | Ilumatobacter | ILUM | PeM15 | PEM15 |
| Bacteroidota | BACT | Bacillus | BACI | IMCC26207 | IMCC | Phreatobacter | PHRE |
| Chloroflexi | CHLO | Bacteroides | BAES | Lactococcus | LACT | Plesiomonas | PLES |
| Cyanobacteria | CYAN | Bradyrhizobium | BRAD | LD29 | LD29 | Propioniciclava | PROP |
| Desulfobacterota | DESU | Cetobacterium | CETO | Legionella | LEGI | Pseudomonas | PSEU |
| Euryarchaeota | EURY | Chloroplast | CHST | Macrococcus | MACR | Ralstonia | RALS |
| Firmicutes | FIRM | Christensenellaceae_R-7_group | CHRI | Methanobacterium | MEUM | Romboutsia | ROMB |
| Fusobacteriota | FUSO | Chryseobacterium | CHRY | Methylocystis | MEIS | Sporichthya | SPOR |
| Planctomycetota | PLAN | Cloacibacterium | CLOA | Microbacterium | MIUM | Stenotrophomonas | STEN |
| Proteobacteria | PROT | Clostridium_sensu_stricto_1 | CLOS1 | Micromonospora | MIRA | Streptococcus | STUS |
| Verrucomicrobiota | VERR | Clostridium_sensu_stricto_4 | CLOS4 | Micropruina | MINA | Streptomyces | STES |
|  |  | Cyanobium_PCC-6307 | CYAN | Microvirga | MIGA | Terrimicrobium | TERR |
|  |  | Desulfomonile | DELE | Mycobacterium | MYCO | Turicibacter | TURI |
|  |  | Enterovibrio | ENTE | Nocardioides | NOCA | unidentified_Chloroplast | UNCH |
|  |  | FukuN57 | FUKU | Paeniclostridium | PAEN | Vagococcus | VAGO |
|  |  | Halomonas | HALO | Paraclostridium | PARA |  |  |

**Table S5** Results of Detrended Correspondence Analysis (DCA) between genus-level gut microbiota data and environmental variables for *C. zillii* from five sampling sites and four seasons of SKSK

| Parameters of DCA | Type of grouping | | | | | | | |
| --- | --- | --- | --- | --- | --- | --- | --- | --- |
| habitat | | | | seasons of SKSK | | | |
| Axes | 1 | 2 | 3 | 4 | 1 | 2 | 3 | 4 |
| Eigenvalues | 0.1793 | 0.0732 | 0.0329 | 0.0131 | 0.1825 | 0.0879 | 0.0597 | 0.0357 |
| Lengths of gradient | 1.28 | 1.39 | 0.95 | 0.74 | 1.81 | 2.20 | 1.38 | 0.97 |
| Pseudo-canonical correlation | 0.8802 | 0.3446 | 0.4585 | 0.5908 | 0.6008 | 0.7112 | 0.6215 | 0.5198 |
| Explained variation (cumulative) (%) | 37.56 | 52.89 | 59.78 | 62.51 | 21.41 | 31.72 | 38.72 | 42.91 |

**Table S6** Results of Detrended Correspondence Analysis (DCA) between phylum-level gut microbiota data and environmental variables for *C. zillii* from five sampling sites and four seasons of SKSK

| Parameters of DCA | Type of grouping | | | | | | | |
| --- | --- | --- | --- | --- | --- | --- | --- | --- |
| habitat | | | | seasons of SKSK | | | |
| Axes | 1 | 2 | 3 | 4 | 1 | 2 | 3 | 4 |
| Eigenvalues | 0.0281 | 0.0116 | 0.0036 | 0.0014 | 0.0696 | 0.0347 | 0.0144 | 0.0088 |
| Lengths of gradient | 0.57 | 0.56 | 0.30 | 0.30 | 1.36 | 1.06 | 0.63 | 0.47 |
| Pseudo-canonical correlation | 0.8114 | 0.4810 | 0.2233 | 0.3844 | 0.3433 | 0.7098 | 0.5326 | 0.4947 |
| Explained variation (cumulative) (%) | 41.13 | 58.08 | 63.35 | 65.37 | 42.71 | 64.01 | 72.83 | 78.25 |

**Table S7** The statistics of effective tags and genus-level OTU counts of *C. zillii* for gut microbiota analysis between habitat types and seasons

| Items | Habitat type | | | | | Seasons of SKSK | | | |
| --- | --- | --- | --- | --- | --- | --- | --- | --- | --- |
| River | | Reservoir | | | Spring | Summer | Autumn | Winter |
| DJ | NDJ | QDH | SKSK | XJ |
| Number of original tags  (Mean ± SD) | 108838 ± 26116 | 126675 ± 13076 | 107872 ± 40850 | 135534 ± 10686 | 124234 ± 9806 | 88844 ± 8931 | 87151 ± 3929 | 106874 ± 3271 | 103601 ± 6613 |
| Number of raw tags  (Mean ± SD) | 107659 ± 25855 | 125411 ± 12981 | 106277 ± 40130 | 132800 ± 10446 | 122884 ± 9710 | 85863 ± 8326 | 86485 ± 3842 | 105628 ± 3424 | 102897 ± 6526 |
| Number of clean tags  (Mean ± SD) | 105880 ± 25370 | 123546 ± 12789 | 104277 ± 39365 | 130262 ± 10201 | 120921 ± 9475 | 84207 ± 8124 | 85172 ± 3391 | 102865 ± 2965 | 100445 ± 6330 |
| Number of effective tags  (Mean ± SD) | 85864 ± 22087 | 93668 ± 7780 | 87171 ± 33983 | 98340 ± 8503 | 105177 ± 7983 | 69433 ± 9914 | 66791 ± 7356 | 89808 ± 7830 | 91400 ± 7822 |
| Average length of effective tags (nt)  (Mean ± SD) | 416 ± 9 | 407 ± 1 | 419 ± 6 | 410 ± 2 | 411 ± 4 | 409 ± 3 | 410 ± 3 | 408 ± 3 | 412 ± 5 |
| Q20 (%)  (Mean ± SD) | 98.40 ± 0.19 | 98.61 ± 0.03 | 98.07 ± 0.15 | 98.00 ± 0.04 | 98.49 ± 0.08 | 98.00 ± 0.16 | 98.58 ± 0.22 | 98.38 ± 0.20 | 98.50 ± 0.16 |
| Q30 (%)  (Mean ± SD) | 94.51 ± 0.46 | 95.06 ± 0.04 | 93.73 ± 0.38 | 93.30 ± 0.10 | 94.79 ± 0.21 | 93.54 ± 0.43 | 95.11 ± 0.66 | 94.70 ± 0.55 | 94.98 ± 0.43 |
| Percentage of effective tags (%)  (Mean ± SD) | 78.96 ± 6.33 | 74.10 ± 2.38 | 80.42 ± 7.08 | 72.72 ± 5.87 | 84.69 ± 1.57 | 77.93 ± 6.27 | 76.53 ± 6.61 | 84.09 ± 7.40 | 88.21 ± 4.46 |
| Total OTUs | 3133 | 3002 | 2627 | 3337 | 2416 | 6825 | 6879 | 8832 | 5666 |

Q20 and Q30 represent the percentage of bases with Phred value more than 20 (sequencing error rate less than 1%) and 30 (sequencing error rate less than 0.1%), respectively.

SD denotes standard deviation. OTUs represents Operational Taxonomic Units.

**Table S8** Relative read abundance (RRA, %) of microbial communities at the phylum level between habitat types.

| Phylum | Habitat type |  |  |  |  |
| --- | --- | --- | --- | --- | --- |
|  | River |  | Reservoir |  |  |
|  | DJ | NDJ | QDH | SKSK | XJ |
| Actinobacteriota | 3.70 ± 1.18 | 11.30 ± 4.23 | 21.50 ± 13.51 | 12.11 ± 5.80 | 2.38 ± 0.52 |
| Bacteroidota | 1.32a ± 0.83 | 1.16ab ± 0.26 | 1.52ab ± 0.59 | 0.64a ± 0.07 | 18.71b ± 7.51 |
| Chloroflexi | 0.76 ± 0.40 | 0.96 ± 0.20 | 0.69 ± 0.31 | 0.44 ± 0.20 | 0.20 ± 0.04 |
| Cyanobacteria | 4.70ab ± 2.77 | 7.90ab± 2.60 | 4.80ab ± 1.96 | 37.12b ± 6.79 | 0.46a ± 0.11 |
| Desulfobacterota | 0.32 ± 0.25 | 0.11 ± 0.02 | 0.18 ± 0.07 | 0.09 ± 0.03 | 0.04 ± 0.01 |
| Firmicutes | 60.10a ± 4.00 | 23.00ab ± 8.68 | 4.77b ± 1.62 | 8.32b ± 2.00 | 27.29ab ± 13.55 |
| Fusobacteriota | 12.46ab ± 6.54 | 12.88ab ± 5.58 | 0.50b ± 0.26 | 15.64ab ± 9.38 | 43.17a ± 10.94 |
| Planctomycetota | 0.19 ± 0.17 | 0.06 ± 0.02 | 0.11 ± 0.05 | 0.23 ± 0.06 | 0.02 ± 0.01 |
| Proteobacteria | 15.18ab ± 5.22 | 40.88b ± 7.07 | 65.35b ± 15.88 | 23.17ab ± 5.97 | 6.92a ± 1.06 |
| Verrucomicrobiota | 0.16ab ± 0.08 | 1.07ab ± 0.29 | 0.17b ± 0.14 | 1.61a ± 0.46 | 0.12ab ± 0.02 |
| Others | 1.11 ± 0.30 | 0.67 ± 0.10 | 0.41 ± 0.21 | 0.63 ± 0.21 | 0.69 ± 0.09 |

Results are expressed as the mean ± standard error of the mean (SEM). Significant differences (Kruskal Wallis rank sum tests) between habitat types are indicated by superscript with different lowercase letters.

**Table S9** Relative read abundance (RRA, %) of microbial communities at the genus level between habitat types.

| Genus | Habitat type |  |  |  |  |
| --- | --- | --- | --- | --- | --- |
|  | River |  | Reservoir |  |  |
|  | DJ | NDJ | QDH | SKSK | XJ |
| *Bacillus* | 19.67a ± 11.76 | 0.66ab ± 0.24 | 0.06b ± 0.02 | 0.56ab ± 0.30 | 0.27ab ± 0.04 |
| *Bacteroides* | 0.01a ± 0.01 | 0.01a ± 0.003 | 0.86b ± 0.45 | 0.16ab ± 0.05 | 0.07ab ± 0.05 |
| *Bradyrhizobium* | 0.56 ± 0.47 | 0.06 ± 0.01 | 0.19 ± 0.07 | 0.40 ± 0.27 | 0.04 ± 0.02 |
| *Cetobacterium* | 12.44ab ± 6.54 | 12.88ab ± 5.58 | 0.43b ± 0.24 | 15.63ab ± 9.38 | 43.16a ± 10.94 |
| *Chloroplast* | 4.14ab ± 2.70 | 7.22ab ± 2.75 | 4.46ab ± 1.79 | 36.94b ± 6.78 | 0.40a ± 0.10 |
| *Clostridium_sensu_stricto_1* | 3.92ab ± 2.77 | 3.78ab ± 1.46 | 0.21b ± 0.15 | 2.63ab ± 1.55 | 5.42a ± 3.01 |
| *Clostridium_sensu_stricto_4* | 0.16ab ± 0.16 | 0.46ab ± 0.12 | 0b | 0b | 11.20a ± 8.73 |
| *Enterovibrio* | 0 | 0 | 0.11 ± 0.05 | 5.46 ± 5.41 | 0.02 ± 0.01 |
| *FukuN57* | 0ab | 0abc | 2.45c ± 1.18 | 0.07bc ± 0.01 | 0a |
| *Ilumatobacter* | 0.01 ± 0.01 | 0.09 ± 0.04 | 0.97 ± 0.81 | 0.08 ± 0.02 | 0.02 ± 0.003 |
| *IMCC26207* | 0.08ab ± 0.03 | 0.07ab ± 0.02 | 0.33ab ± 0.16 | 1.33b ± 0.58 | 0.03a ± 0.005 |
| *Lactococcus* | 0.66 ± 0.53 | 0.14 ± 0.04 | 0.01 ± 0.003 | 0.02 ± 0.01 | 0.09 ± 0.04 |
| *Legionella* | 0.70ab ± 0.66 | 0.05ab ± 0.03 | 0.11ab ± 0.05 | 0.71b ± 0.32 | 0.02a ± 0.005 |
| *Macrococcus* | 7.54a ± 7.33 | 0.07ab ± 0.07 | 0b | 0b | 0.04ab ± 0.03 |
| *Methylocystis* | 0.79ab ± 0.45 | 0.12ab ± 0.04 | 0.17ab ± 0.07 | 1.20b ± 0.41 | 0.01a ± 0.01 |
| *Micromonospora* | 0.01ab ± 0.01 | 0.01abc ± 0.004 | 0.66bc ± 0.46 | 3.25c ± 3.03 | 0a |
| *Mycobacterium* | 0.74 ± 0.47 | 7.00 ± 2.84 | 0.45 ± 0.19 | 0.91 ± 0.23 | 0.40 ± 0.08 |
| *Nocardioides* | 0.07 ± 0.07 | 0.05 ± 0.01 | 0.33 ± 0.12 | 0.56 ± 0.38 | 0.07 ± 0.03 |
| *Paraclostridium* | 0.07ab ± 0.06 | 0.19ab ± 0.04 | 0b | 0b | 1.11a ± 0.87 |
| *PeM15* | 0.16 ± 0.06 | 0.10 ± 0.03 | 0.96 ± 0.72 | 0.19 ± 0.06 | 0.08 ± 0.02 |
| *Phreatobacter* | 0.15 ± 0.12 | 0.47 ± 0.13 | 1.52 ± 0.68 | 0.48 ± 0.18 | 0.06 ± 0.02 |
| *Plesiomonas* | 0.07a ± 0.07 | 0.28ab ± 0.06 | 0a | 0.01a ± 0.01 | 2.48b ± 0.92 |
| *Ralstonia* | 6.71a ± 4.57 | 0.17ab ± 0.08 | 50.86a ± 17.31 | 0.02b ± 0.01 | 0.10ab ± 0.03 |
| *Romboutsia* | 13.56a ± 10.37 | 8.12a ± 3.91 | 0.15b ± 0.07 | 0.62ab ± 0.18 | 5.07a ± 1.14 |
| *Sporichthya* | 0.02 ± 0.01 | 0.12 ± 0.05 | 0.86 ± 0.72 | 0.23 ± 0.12 | 0.02 ± 0.005 |
| *Streptococcus* | 4.40 ± 4.02 | 0.43 ± 0.14 | 0.09 ± 0.04 | 0.52 ± 0.17 | 0.22 ± 0.03 |
| *Streptomyces* | 0.04 ± 0.02 | 0.02 ± 0.01 | 0.10 ± 0.05 | 0.65 ± 0.60 | 0.13 ± 0.09 |
| *Terrimicrobium* | 0.01a ± 0.01 | 0ab | 0.02ab ± 0.02 | 1.16b ± 0.49 | 0a |
| *Turicibacter* | 0.21ab ± 0.06 | 1.04a ± 0.47 | 0.10b ± 0.07 | 0.14ab ± 0.03 | 0.14ab ± 0.02 |
| *Vagococcus* | 0.44 ± 0.41 | 0.01 ± 0.004 | 0 | 0 | 0.05 ± 0.03 |
| Others | 22.67 ± 7.04 | 56.37 ± 4.44 | 33.55 ± 12.90 | 26.08 ± 4.74 | 29.31 ± 5.57 |

Results are expressed as the mean ± standard error of the mean (SEM). Significant differences (Kruskal Wallis rank sum tests) between habitat types are indicated by superscript with different lowercase letters.

**Table S10** Relative read abundance (RRA, %) of microbial communities at the phylum level between seasons in SKSK Reservoir.

| Phylum | Season |  |  |  |
| --- | --- | --- | --- | --- |
|  | Spring | Summer | Autumn | Winter |
| Actinobacteriota | 10.29 ± 3.69 | 19.03 ± 6.22 | 17.22 ± 2.52 | 13.39 ± 5.49 |
| Bacteroidota | 3.19a ± 0.95 | 4.18ab ± 2.04 | 0.60b ± 0.32 | 9.84a ± 3.63 |
| Chloroflexi | 0.37a ± 0.09 | 0.88a ± 0.49 | 5.87b ± 1.50 | 0.45a ± 0.12 |
| Cyanobacteria | 16.34a ± 4.79 | 3.63b ± 2.32 | 6.37ab ± 3.67 | 6.20ab ± 2.35 |
| Desulfobacterota | 0.28ab ± 0.11 | 1.38a ± 1.33 | 0.65b ± 0.18 | 0.06ab ± 0.02 |
| Euryarchaeota | 0.12a ± 0.08 | 2.27ab ± 1.05 | 6.46b ± 1.81 | 0.98a ± 0.58 |
| Firmicutes | 15.87 ± 4.06 | 24.83 ± 4.84 | 18.94 ± 2.78 | 13.82 ± 3.85 |
| Fusobacteriota | 19.88 ± 6.53 | 29.45 ± 8.27 | 21.75 ± 7.05 | 20.81 ± 6.70 |
| Proteobacteria | 30.85a ± 6.09 | 11.04b ± 2.92 | 18.89ab ± 3.53 | 32.37ab ± 7.59 |
| Verrucomicrobiota | 0.94ab ± 0.24 | 1.58a ± 1.44 | 0.97b ± 0.23 | 0.85ab ± 0.39 |
| Others | 1.86 ± 0.46 | 1.73 ± 0.80 | 2.29 ± 0.36 | 1.23 ± 0.29 |

Results are expressed as the mean ± standard error of mean (SEM). Significant differences (Kruskal Wallis rank sum tests) between seasons are indicated by superscript with different lowercase letters.

**Table S11** Relative read abundance (RRA, %) of microbial communities at the genus level between seasons in SKSK Reservoir.

| Genus | Season |  |  |  |
| --- | --- | --- | --- | --- |
|  | Spring | Summer | Autumn | Winter |
| *Allorhizobium-Neorhizobium-Pararhizobium-Rhizobium* | 6.70 ± 3.81 | 0.98 ± 0.62 | 0.26 ± 0.06 | 2.55 ± 1.94 |
| *Bacillus* | 0.92a ± 0.32 | 1.20ab ± 0.70 | 0.14b ± 0.03 | 0.41ab ± 0.22 |
| *Bradyrhizobium* | 0.75 ± 0.21 | 0.81 ± 0.52 | 0.47 ± 0.23 | 0.49 ± 0.33 |
| *Cetobacterium* | 19.88 ± 6.53 | 29.45 ± 8.27 | 21.74 ± 7.05 | 20.81 ± 6.70 |
| unidentified_*Chloroplast* | 16.07a ± 4.79 | 2.29b ± 1.57 | 2.57b ± 1.50 | 5.96ab ± 2.30 |
| *Christensenellaceae_R-7_group* | 0.02a ± 0.01 | 0.30a ± 0.12 | 6.73b ± 1.98 | 0.23a ± 0.11 |
| *Chryseobacterium* | 0a | 0.01a ± 0.01 | 0a | 9.33b ± 3.71 |
| *Cloacibacterium* | 0.01 ± 0.005 | 0.82 ± 0.69 | 0.01 ± 0.006 | 0 |
| *Clostridium_sensu_stricto_1* | 7.42 ± 3.97 | 2.20 ± 0.61 | 0.83 ± 0.19 | 1.45 ± 0.41 |
| *Cyanobium_PCC-6307* | 0.09 ± 0.03 | 0.76 ± 0.70 | 2.84 ± 1.71 | 0.15 ± 0.06 |
| *Desulfomonile* | 0.05a ± 0.05 | 1.29ab ± 1.27 | 0.17b ± 0.06 | 0.01ab ± 0.005 |
| *Enterovibrio* | 1.85ab ± 1.81 | 0a | 0.01ab ± 0.01 | 0.24b ± 0.19 |
| *Halomonas* | 0 | 0.47 ± 0.47 | 0 | 0 |
| *Lactococcus* | 0.94 ± 0.86 | 0.29 ± 0.16 | 0.75 ± 0.55 | 1.08 ± 0.59 |
| *LD29* | 0a | 1.43ab ± 1.42 | 0.02b ± 0.005 | 0a |
| *Methanobacterium* | 0.11a ± 0.08 | 1.99ab ± 1.001 | 6.36b ± 1.80 | 0.80a ± 0.52 |
| *Methylocystis* | 0.49 ± 0.19 | 0.16 ± 0.07 | 1.21 ± 0.54 | 0.71 ± 0.24 |
| *Microbacterium* | 0.66 ± 0.53 | 1.83 ± 1.14 | 0.39 ± 0.08 | 0.70 ± 0.30 |
| *Micromonospora* | 1.86a ± 1.23 | 0.05ab ± 0.03 | 0b | 0ab |
| *Micropruina* | 0.04a ± 0.04 | 0.91ab ± 0.59 | 0.11b ± 0.05 | 0.23ab ± 0.12 |
| *Microvirga* | 0.09 ± 0.04 | 1.02 ± 0.91 | 0.08 ± 0.01 | 0.02 ± 0.007 |
| *Mycobacterium* | 0.46 ± 0.15 | 1.05 ± 0.67 | 0.82 ± 0.13 | 0.46 ± 0.17 |
| *Paeniclostridium* | 0.36 ± 0.11 | 1.17 ± 0.71 | 0.17 ± 0.07 | 0.63 ± 0.42 |
| *Plesiomonas* | 1.07 ± 1.03 | 0.90 ± 0.59 | 0.02 ± 0.02 | 0.03 ± 0.01 |
| *Propioniciclava* | 0.07a ± 0.06 | 1.85ab ± 0.75 | 4.53b ± 1.08 | 1.05a ± 0.55 |
| *Pseudomonas* | 0.11a ± 0.07 | 0.01b ± 0.008 | 3.34ab ± 2.08 | 0.01b ± 0.005 |
| *Ralstonia* | 1.80a ± 0.73 | 2.58b ± 2.50 | 0.13ab ± 0.06 | 0.02b ± 0.005 |
| *Romboutsia* | 0.48a ± 0.13 | 11.33b ± 3.45 | 5.24ab ± 2.54 | 3.64ab ± 1.25 |
| *Stenotrophomonas* | 0.22a ± 0.08 | 0.02a ± 0.01 | 0.06a ± 0.05 | 9.42b ± 3.85 |
| *Streptococcus* | 0.35 ± 0.15 | 1.53 ± 0.72 | 0.22 ± 0.11 | 0.20 ± 0.11 |
| Others | 37.13 ± 5.45 | 31.31 ± 6.07 | 40.73 ± 4.36 | 39.35 ± 7.66 |

Results are expressed as the mean ± standard error of mean (SEM). Significant differences (Kruskal Wallis rank sum tests) between seasons are indicated by superscript with different lowercase letters.

**Table S12** Weighted unifrac distances (lower triangular matrix) and Bray-Curtis distances (upper triangular matrix) of gut microbiota differences between five sampling sites.

|  | DJ | NDJ | QDH | SKSK | XJ |
| --- | --- | --- | --- | --- | --- |
| DJ | - | 0.6717 | 0.9022 | 0.7973 | 0.7479 |
| NDJ | 0.3078 | - | 0.9598 | 0.8033 | 0.7317 |
| QDH | 0.4512 | 0.4055 | - | 0.9269 | 0.9795 |
| SKSK | 0.4878 | 0.3495 | 0.5119 | - | 0.8232 |
| XJ | 0.4479 | 0.4088 | 0.5526 | 0.5799 | - |

**Table S13** Schoener overlap index of gut microbiota at the phylum level (upper triangular matrix) and genus level (lower triangular matrix) across five sampling sites.

|  | DJ | NDJ | QDH | SKSK | XJ |
| --- | --- | --- | --- | --- | --- |
| DJ | - | **0.6195** | 0.3171 | 0.4651 | 0.5191 |
| NDJ | 0.5456 | - | **0.6485** | **0.6650** | 0.4786 |
| QDH | 0.3603 | 0.4086 | - | 0.4720 | 0.1734 |
| SKSK | 0.4693 | 0.5268 | 0.3530 | - | 0.3538 |
| XJ | 0.4648 | 0.5398 | 0.3179 | 0.4699 | - |

Indices greater than 0.6 are shown in bold.

**Table S14** Weighted unifrac distances (lower triangular matrix) and Bray-Curtis distances (upper triangular matrix) of gut microbiota differences between four seasons in SKSK.

|  | Spring | Summer | Autumn | Winter |
| --- | --- | --- | --- | --- |
| Spring | - | 0.6901 | 0.7146 | 0.6909 |
| Summer | 0.3666 | - | 0.5839 | 0.6365 |
| Autumn | 0.4087 | 0.3114 | - | 0.6109 |
| Winter | 0.2957 | 0.3034 | 0.3340 | - |

**Table S15** Schoener overlap index of gut microbiota at the phylum level (upper triangular matrix) and genus level (lower triangular matrix) across four seasons in SKSK.

|  | Spring | Summer | Autumn | Winter |
| --- | --- | --- | --- | --- |
| Spring | - | **0.6735** | **0.7547** | **0.8687** |
| Summer | **0.6434** | **-** | **0.7968** | **0.7045** |
| Autumn | **0.6507** | **0.6983** | **-** | **0.7728** |
| Winter | **0.7235** | **0.6643** | **0.7328** | - |

Indices greater than 0.6 are shown in bold.

**Table S16** Optimal multivariable linear regression modeling of Shannon-Wiener index, Pielou’s evenness index and Niche breadth index in relation to environmental factors for *C. zillii* from 5 sampling sites

|  |  | Unstandardized Coefficients | | Standardized Coefficients |  |  | Full Model Statistics | | |
| --- | --- | --- | --- | --- | --- | --- | --- | --- | --- |
| Response variables | Explanatory variables | B | S.E. | Beta | *t* | *Pr* (>︱*t*︱) | Adjusted *R*2 | *F* | *Pr* (*>F*) |
| Shannon-Wiener index | TEMP | 0.007 | 0.147 | 0.012 | 0.050 | 0.961 | 0.165 | 2.518 | 0.087 |
| DO | -0.639 | 0.327 | -0.413 | -1.957 | 0.064 |
| COND | -0.005 | 0.003 | -0.433 | -1.776 | 0.091 |
| Pielou’s evenness index | TEMP | 0 | 0.013 | 0.009 | 0.038 | 0.970 | 0.203 | 2.953 | 0.057 |
| DO | -0.064 | 0.029 | -0.461 | -2.234 | 0.037 |
| COND | 0 | 0 | -0.438 | -1.839 | 0.081 |
| Niche breadth index | TEMP | 0.001 | 0.096 | 0.001 | 0.006 | 0.995 | 0.199 | 2.903 | 0.060 |
| DO | -0.568 | 0.214 | -0.551 | -2.661 | 0.015 |
| COND | -0.002 | 0.002 | -0.279 | -1.168 | 0.256 |

**Table S17**  Optimal multivariable linear regression modeling of Shannon-Wiener index, Pielou’s evenness index and Niche breadth index in relation to environmental factors of *C. zillii* from four seasons of SKSK.

|  |  | Unstandardized Coefficients | | Standardized Coefficients |  |  | Full Model Statistics | | |
| --- | --- | --- | --- | --- | --- | --- | --- | --- | --- |
| Response variables | Explanatory variables | B | S.E. | Beta | *t* | *Pr* (>︱*t*︱) | Adjusted *R*2 | *F* | *Pr* (*>F*) |
| Shannon-Wiener index | pH | -0.759 | 1.186 | -0.130 | -0.640 | 0.525 | -0.008 | 0.929 | 0.483 |
| COND | 0.031 | 0.015 | 0.405 | 2.035 | 0.047 |
| TD | 0.029 | 0.025 | 0.275 | 1.176 | 0.245 |
| PI | -0.212 | 1.391 | -0.037 | -0.153 | 0.879 |
| TP | -30.692 | 41.122 | -0.153 | -0.746 | 0.459 |
| TN | 0.085 | 1.384 | 0.012 | 0.061 | 0.951 |
| Pielou’s evenness index | pH | -0.096 | 0.094 | -0.209 | -1.020 | 0.312 | -0.030 | 0.725 | 0.631 |
| COND | 0.002 | 0.001 | 0.337 | 1.678 | 0.099 |
| TD | 0.002 | 0.002 | 0.191 | 0.809 | 0.422 |
| PI | 0.021 | 0.111 | 0.047 | 0.191 | 0.849 |
| TP | -1.921 | 3.273 | -0.121 | -0.587 | 0.560 |
| TN | 0.028 | 0.110 | 0.049 | 0.255 | 0.800 |
| Niche breadth index | pH | 0.865 | 0.571 | 0.310 | 1.515 | 0.136 | -0.020 | 0.810 | 0.567 |
| COND | -0.001 | 0.007 | -0.039 | -0.193 | 0.847 |
| TD | 0.004 | 0.012 | 0.075 | 0.319 | 0.751 |
| PI | 0.016 | 0.670 | 0.006 | 0.024 | 0.981 |
| TP | 1.050 | 19.808 | 0.011 | 0.053 | 0.958 |
| TN | -0.714 | 0.667 | -0.204 | -1.071 | 0.289 |

**Table S18** Geographic distances (km) between five sampling sites.

|  | DJ | NDJ | QDH | SKSK | XJ |
| --- | --- | --- | --- | --- | --- |
| DJ | - |  |  |  |  |
| NDJ | 581.29 | - |  |  |  |
| QDH | 841.68 | 1404.82 | - |  |  |
| SKSK | 533.61 | 1114.54 | 358.15 | - |  |
| XJ | 617.07 | 506.27 | 1211.33 | 1030.87 | - |
